# Supplementary material
Source: PubMed Central journal article supplement (PMC55435)

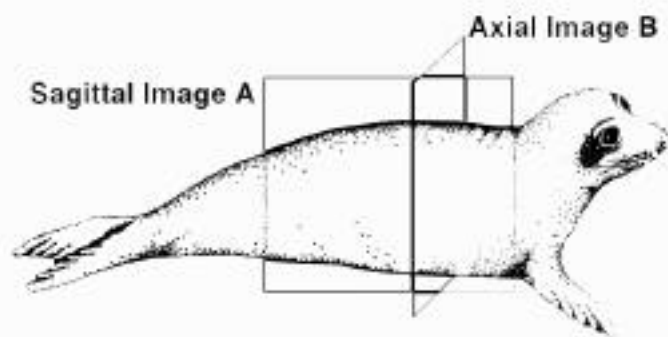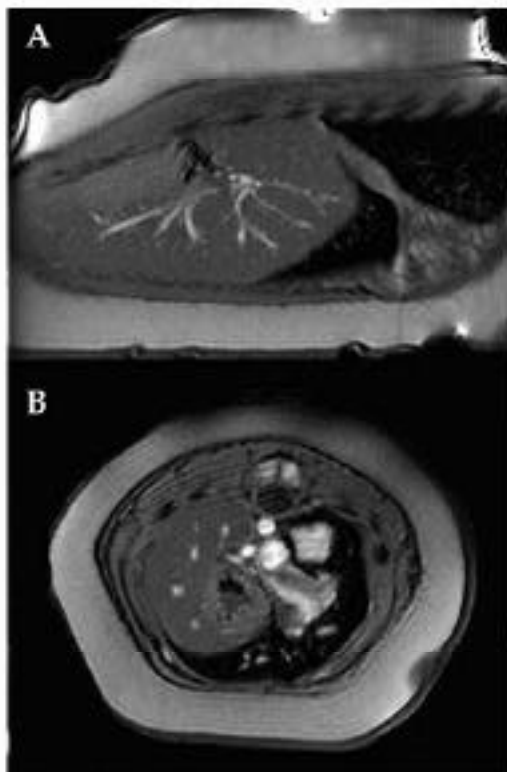

Supplement: pnas_98_16_9413__2.pdf [file pnas_98_16_9413__2.pdf]
